# Supplementary material for: Comparison of Gut Viral Communities in Atopic Dermatitis and Healthy Children
Source: Front Med (Lausanne). 2022 Feb 21;9:835467. doi: 10.3389/fmed.2022.835467 (PMC8899399; doi:10.3389/fmed.2022.835467)
Supplement: Supplementary Table 2 — The summary of the percentage information of viruses under different categories. [file Table_2.xlsx]

## Sheet: Sheet2
Phylum	Healthy	AD	Fold change (AD/Healthy)	Fold change (Healthy/AD)
Peploviricota	9.04175e-05	7.25122e-06	0.080197	12.4693
Uroviricota	0.161969	0.0843478	0.520764	1.92026
Hofneiviricota	1.58464e-05	0.0707152	4462.55	0.000224087
Phixviricota	0.643178	0.564529	0.877718	1.13932
Cossaviricota	0.00048378	2.81186e-05	0.0581227	17.205
Cressdnaviricota	6.99104e-05	0	0	-
Kitrinoviricota	0.0125419	0.277679	22.14	0.0451671
Lenarviricota	1.86428e-06	0	0	-
Negarnaviricota	9.32139e-07	0	0	-
Pisuviricota	0.171943	7.09813e-05	0.000412818	2422.37
Artverviricota	0.00332401	0	0	-
Nucleocytoviricota	0.00638049	0.00255082	0.399784	2.50135
Preplasmiviricota	0	7.21093e-05	-	0
Class
Herviviricetes	9.04271e-05	7.25223e-06	0.0801997	12.4689
Caudoviricetes	0.161987	0.0843596	0.520781	1.92019
Faserviricetes	1.58481e-05	0.0707251	4462.7	0.00022408
Malgrandaviricetes	0.643246	0.564608	0.877747	1.13928
Quintoviricetes	0.000481035	2.78808e-05	0.05796	17.2533
Arfiviricetes	3.35606e-05	0	0	-
Repensiviricetes	8.39015e-06	0	0	-
Alsuviricetes	0.0125116	0.277684	22.1942	0.0450568
Flasuviricetes	2.79672e-06	0	0	-
Tolucaviricetes	9.32238e-07	0	0	-
Howeltoviricetes	1.86448e-06	0	0	-
Monjiviricetes	9.32238e-07	0	0	-
Pisoniviricetes	0.168336	7.07495e-05	0.000420287	2379.33
Stelpaviricetes	0.00361895	0	0	-
Revtraviricetes	0.00332436	0	0	-
Megaviricetes	0.00519816	0.00229146	0.440822	2.26849
Pokkesviricetes	0.00114199	0.000153989	0.134842	7.41607
Tectiliviricetes	0	7.21194e-05	-	0
Order
Herpesvirales	9.0477e-05	7.25577e-06	0.0801946	12.4697
Caudovirales	0.162076	0.0844008	0.520748	1.92031
Tubulavirales	1.58568e-05	0.0707596	4462.42	0.000224094
Petitvirales	0.643601	0.564883	0.877692	1.13935
Piccovirales	0.0004813	2.78944e-05	0.0579563	17.2544
Cirlivirales	3.17136e-05	0	0	-
Geplafuvirales	8.39477e-06	0	0	-
Martellivirales	0.0124914	0.277707	22.2318	0.0449806
Tymovirales	1.21258e-05	0	0	-
Amarillovirales	2.79826e-06	0	0	-
Tolivirales	9.32752e-07	0	0	-
Cryppavirales	1.8655e-06	0	0	-
Mononegavirales	9.32752e-07	0	0	-
Picornavirales	0.168414	7.0784e-05	0.000420298	2379.27
Sobelivirales	4.66376e-06	0	0	-
Stellavirales	0.00362001	0	0	-
Ortervirales	0.00332619	0	0	-
Algavirales	0.000757395	0.000843039	1.11308	0.89841
Imitervirales	0.00179088	0.000932447	0.520663	1.92063
Pimascovirales	0.00213041	0.000142374	0.0668296	14.9634
Chitovirales	0.00114169	0.000154064	0.134944	7.41048
Rowavirales	0	7.17515e-05	-	0
Famliy
Anelloviridae	0.000197334	1.06174e-05	0.0538043	18.5859
Baculoviridae	9.48719e-07	0	0	-
Herpesviridae	9.1077e-05	7.29439e-06	0.0800904	12.4859
Ackermannviridae	0.001184	0.000835937	0.706027	1.41638
Autographiviridae	0.00170959	0.000173282	0.101359	9.86593
Demerecviridae	0.000788385	0.000343404	0.435578	2.2958
Drexlerviridae	0.00398462	0	0	-
Herelleviridae	0.00138987	0.000290965	0.209347	4.77677
Myoviridae	0.0160428	0.00533885	0.332787	3.00493
Podoviridae	0.0256581	0.0214798	0.837154	1.19452
Siphoviridae	0.0968727	0.0511439	0.527949	1.89412
Inoviridae	1.61282e-05	0.0711363	4410.67	0.000226723
Microviridae	0.654618	0.56789	0.867514	1.15272
Parvoviridae	0.000489539	2.80429e-05	0.0572843	17.4568
Circoviridae	3.22564e-05	0	0	-
Genomoviridae	8.53847e-06	0	0	-
Nudiviridae	9.48719e-07	0	0	-
Bromoviridae	1.80257e-05	0	0	-
Closteroviridae	0	0.00072255	-	0
Virgaviridae	0.0126132	0.278426	22.0742	0.0453018
Alphaflexiviridae	7.58975e-06	0	0	-
Betaflexiviridae	4.74359e-06	0	0	-
Flaviviridae	2.84616e-06	0	0	-
Tombusviridae	9.48719e-07	0	0	-
Mitoviridae	1.89744e-06	0	0	-
Rhabdoviridae	9.48719e-07	0	0	-
Caliciviridae	0.00618754	7.07556e-05	0.0114352	87.4496
Picornaviridae	0.165026	0	0	-
Solemoviridae	4.74359e-06	0	0	-
Astroviridae	0.00368198	0	0	-
Retroviridae	0.0033727	0	0	-
Pithoviridae	8.82309e-05	0	0	-
Phycodnaviridae	0.00077036	0.000847527	1.10017	0.90895
Mimiviridae	0.00182154	0.00093741	0.514625	1.94316
Iridoviridae	0.00175892	0	0	-
Marseilleviridae	0.000391821	8.964e-05	0.228778	4.37105
Poxviridae	0.00116123	0.000154884	0.133379	7.49742
Adenoviridae	0	7.21334e-05	-	0
Genus
Betatorquevirus	4.23114e-06	0	0	-
Gammatorquevirus	2.53868e-05	0	0	-
Alphabaculovirus	4.23114e-06	0	0	-
Simplexvirus	2.11557e-05	2.23915e-05	1.05841	0.94481
Cytomegalovirus	2.53868e-05	0	0	-
Rhadinovirus	4.23114e-06	0	0	-
Agtrevirus	3.38491e-05	0	0	-
Kuttervirus	9.30851e-05	0	0	-
Taipeivirus	0.000118472	0.000231472	1.95381	0.51182
Acadevirus	4.23114e-06	0	0	-
Drulisvirus	3.80802e-05	0	0	-
Kayfunavirus	0	0.00015814	-	0
Przondovirus	0.00481504	0	0	-
Voetvirus	4.23114e-06	0	0	-
Cetovirus	6.76982e-05	0	0	-
Vipunavirus	0	0.00117807	-	0
Epseptimavirus	0.000190401	0	0	-
Haartmanvirus	2.9618e-05	0	0	-
Tequintavirus	0.000647364	0	0	-
Hongcheonvirus	8.46228e-06	0	0	-
Myunavirus	4.23114e-05	0	0	-
Pogseptimavirus	8.46228e-06	0	0	-
Sugarlandvirus	0.0007066	0	0	-
Eastlansingvirus	0.000160783	0	0	-
Rogunavirus	4.23114e-06	0	0	-
Hanrivervirus	0.00149359	0	0	-
Tlsvirus	0.00257253	0	0	-
Warwickvirus	0.00145128	0	0	-
Sertoctavirus	4.23114e-06	0	0	-
Tunavirus	0.000165014	0	0	-
Vilniusvirus	4.23114e-06	0	0	-
Webervirus	0.00135396	0	0	-
Bastillevirus	2.9618e-05	0	0	-
Bequatrovirus	0.000249637	0	0	-
Caeruleovirus	7.61605e-05	0.00065803	8.64004	0.11574
Tsarbombavirus	0.000266562	0	0	-
Kochikohdavirus	2.53868e-05	0	0	-
Schiekvirus	0.000562741	0	0	-
Pecentumvirus	0.000139628	0	0	-
Siminovitchvirus	4.23114e-06	0	0	-
Lilyvirus	0.00104509	0	0	-
Abouovirus	0.000156552	5.93374e-05	0.379027	2.63834
Alcyoneusvirus	0.000143859	0	0	-
Alexandravirus	0	3.47068e-05	-	0
Asteriusvirus	1.26934e-05	0	0	-
Atlauavirus	4.23114e-06	0	0	-
Bcepmuvirus	1.26934e-05	0	0	-
Bellamyvirus	2.53868e-05	0	0	-
Biquartavirus	8.46228e-06	0	0	-
Bixzunavirus	4.23114e-05	0	0	-
Chiangmaivirus	8.46228e-06	0	0	-
Emdodecavirus	4.23114e-06	0	0	-
Eponavirus	0.00164591	0	0	-
Eurybiavirus	3.80802e-05	0	0	-
Ficleduovirus	3.38491e-05	0	0	-
Flaumdravirus	0.000139628	0	0	-
Gofduovirus	3.38491e-05	0	0	-
Goslarvirus	2.53868e-05	0	0	-
Hapunavirus	8.46228e-06	0	0	-
Heilongjiangvirus	8.46228e-06	0	0	-
Ionavirus	4.23114e-05	0	0	-
Jimmervirus	0.000131165	0	0	-
Lagaffevirus	6.76982e-05	0	0	-
Llyrvirus	1.69246e-05	0	0	-
Loughboroughvirus	0.000605053	0	0	-
Lubbockvirus	0.00390957	0.000110838	0.0283504	35.2729
Mieseafarmvirus	6.76982e-05	0	0	-
Naesvirus	0.000930851	0	0	-
Neptunevirus	0	0.00078986	-	0
Obolenskvirus	0.000139628	0.000388492	2.78235	0.359409
Otagovirus	0.000143859	0.000198724	1.38139	0.723911
Felixounavirus	4.23114e-06	0	0	-
Pakpunavirus	4.23114e-05	0	0	-
Pbunavirus	0.000918157	0	0	-
Aresaunavirus	4.23114e-06	0	0	-
Hpunavirus	2.53868e-05	0	0	-
Nampongvirus	4.23114e-06	0	0	-
Peduovirus	8.46228e-06	0	0	-
Phabquatrovirus	4.23114e-06	0	0	-
Phikzvirus	2.53868e-05	0	0	-
Polybotosvirus	0.000131165	0	0	-
Popoffvirus	4.23114e-06	0	0	-
Punavirus	0.000490812	0.000141066	0.287414	3.4793
Qingdaovirus	7.61605e-05	0	0	-
Salacisavirus	4.23114e-06	0	0	-
Seoulvirus	0.00261061	0.00458186	1.75509	0.569772
Svunavirus	0.000143859	0.000217197	1.5098	0.662341
Taranisvirus	0.00365147	0	0	-
Gaprivervirus	8.46228e-06	0	0	-
Schizotequatrovirus	0.000888539	0	0	-
Slopekvirus	0	2.04322e-05	-	0
Tequatrovirus	0.00363032	0.00015786	0.0434838	22.9971
Thornevirus	8.46228e-06	0	0	-
Tijeunavirus	2.53868e-05	0	0	-
Toutatisvirus	0.000122703	0	0	-
Avunavirus	0.000207326	0.000444471	2.14383	0.466455
Certrevirus	4.23114e-05	0	0	-
Vhmlvirus	6.34671e-05	0	0	-
Viunavirus	1.69246e-05	0	0	-
Yokohamavirus	4.65425e-05	0	0	-
Baltimorevirus	2.11557e-05	0	0	-
Bruynoghevirus	0.0104044	0.000274855	0.0264173	37.854
Fipvunavirus	0.000211557	4.4783e-05	0.211683	4.72405
Giessenvirus	1.69246e-05	0	0	-
Hollowayvirus	4.23114e-06	0	0	-
Ithacavirus	0	0.000567624	-	0
Jwalphavirus	4.23114e-06	0	0	-
Kelquatrovirus	0.000283486	0	0	-
Kuravirus	8.46228e-06	0	0	-
Lederbergvirus	0.000478119	0.00782862	16.3738	0.0610732
Lessievirus	2.53868e-05	0	0	-
Lightbulbvirus	0.00525931	0.00188032	0.357523	2.79702
Litunavirus	0	2.32312e-05	-	0
Myxoctovirus	4.23114e-06	0	0	-
Pagevirus	0.00048235	0	0	-
Cepunavirus	0.00431999	0	0	-
Salasvirus	0.00299565	0	0	-
Rauchvirus	0.000643133	0	0	-
Ryyoungvirus	9.30851e-05	0	0	-
Schmidvirus	0.00022425	0	0	-
Diegovirus	0.000215788	0	0	-
Oslovirus	4.23114e-06	0.000293328	69.3261	0.0144246
Traversvirus	9.73162e-05	0.000134629	1.38342	0.722848
Skarprettervirus	0	5.12205e-05	-	0
Uetakevirus	0.0138316	0.000233431	0.0168767	59.2534
Ahduovirus	2.11557e-05	0.00767832	362.943	0.00275525
Amigovirus	0.000165014	0	0	-
Anatolevirus	0.00011001	0	0	-
Andromedavirus	1.69246e-05	0	0	-
Likavirus	0.000101547	0	0	-
Bingvirus	0.00524661	0	0	-
Biseptimavirus	5.07737e-05	0	0	-
Bridgettevirus	0.000135396	0	0	-
Bronvirus	0.000194632	0	0	-
Cbastvirus	4.23114e-06	0	0	-
Ceetrepovirus	0.000313104	0	0	-
Cequinquevirus	0.006169	0	0	-
Cheoctovirus	0.00228058	0	0	-
Chunghsingvirus	2.11557e-05	0	0	-
Cimpunavirus	3.38491e-05	0	0	-
Cinunavirus	1.69246e-05	0	0	-
Coetzeevirus	0.000118472	0	0	-
Delepquintavirus	6.34671e-05	0	0	-
Demosthenesvirus	4.23114e-06	0	0	-
Detrevirus	8.46228e-06	0	0	-
Dhillonvirus	9.30851e-05	0	0	-
Colossusvirus	2.11557e-05	0	0	-
Doucettevirus	0.029326	0	0	-
Efquatrovirus	0.000165014	0	0	-
Eisenstarkvirus	1.26934e-05	0	0	-
Elerivirus	4.23114e-06	0	0	-
Feofaniavirus	1.69246e-05	0.000118955	7.02853	0.142277
Fibralongavirus	6.34671e-05	0.000336152	5.29648	0.188805
Fromanvirus	0.000321567	0	0	-
Gaiavirus	2.53868e-05	0	0	-
Gesputvirus	0.000122703	0	0	-
Goodmanvirus	8.46228e-06	0	0	-
Gordonvirus	0.00479388	0	0	-
Jerseyvirus	1.69246e-05	0	0	-
Kagunavirus	2.53868e-05	0.000752914	29.6576	0.0337181
Helsingorvirus	0	0.000674543	-	0
Hendrixvirus	0.00103663	0.00211823	2.04339	0.489384
Incheonvrus	3.80802e-05	0	0	-
Jenstvirus	4.23114e-06	0	0	-
Juiceboxvirus	2.53868e-05	0	0	-
Korravirus	4.23114e-06	0	0	-
Kostyavirus	5.92359e-05	0	0	-
Lacusarxvirus	5.07737e-05	0	0	-
Lambdavirus	2.11557e-05	0.000207681	9.81679	0.101866
Laroyevirus	5.50048e-05	0	0	-
Lentavirus	0.00403651	1.8473e-05	0.00457648	218.509
Luckybarnesvirus	4.23114e-06	0	0	-
Lughvirus	0.00011001	0	0	-
Lwoffvirus	2.11557e-05	0	0	-
Mapvirus	2.53868e-05	0	0	-
Minunavirus	4.23114e-06	0	0	-
Moineauvirus	0.00115933	0	0	-
Mudcatvirus	0.00257253	0	0	-
Murrayvirus	0	9.2085e-05	-	0
Nazgulvirus	4.23114e-06	0	0	-
Neferthenavirus	4.23114e-06	0	0	-
Nickievirus	0.00105355	0	0	-
Nipunavirus	0.000495043	0	0	-
Nonagvirus	8.46228e-05	0	0	-
Nonanavirus	9.30851e-05	0	0	-
Nyceiraevirus	0.000198864	0	0	-
Nymphadoravirus	1.69246e-05	0	0	-
Oengusvirus	0.000812379	0	0	-
Omegavirus	1.26934e-05	1.70735e-05	1.34507	0.743457
Oshimavirus	0	3.89052e-05	-	0
Pahexavirus	2.11557e-05	0	0	-
Pepyhexavirus	0.00275024	0	0	-
Phietavirus	0.000638902	0	0	-
Phifelvirus	0.000126934	0	0	-
Pikminvirus	0.000165014	0	0	-
Pulverervirus	7.19294e-05	0	0	-
Raleighvirus	1.69246e-05	0	0	-
Ravinvirus	1.26934e-05	0	0	-
Rimavirus	0.00146397	0	0	-
Samwavirus	0	0.000650752	-	0
Sanovirus	0	0.000114476	-	0
Saundersvirus	0.000681213	0	0	-
Scapunavirus	0.00175169	0	0	-
Seuratvirus	0.000228481	0	0	-
Sextaecvirus	0.000245406	0	0	-
Sitaravirus	1.26934e-05	0	0	-
Skunavirus	0.00191671	0.00034063	0.177717	5.62694
Smoothievirus	4.23114e-06	0	0	-
Sonalivirus	4.65425e-05	0	0	-
Spbetavirus	0.000414652	0	0	-
Timquatrovirus	2.11557e-05	0	0	-
Triavirus	0	0.000123713	-	0
Trigintaduovirus	0	0.000307603	-	0
Trinavirus	8.88539e-05	0	0	-
Trippvirus	4.23114e-06	0	0	-
Maenadvirus	8.46228e-06	0	0	-
Vegasvirus	0.000575435	0	0	-
Vendettavirus	0.000126934	0	0	-
Vhulanivirus	4.23114e-06	0	0	-
Wbetavirus	8.46228e-06	0	0	-
Xipdecavirus	1.69246e-05	0	0	-
Yuavirus	1.69246e-05	0	0	-
Sinsheimervirus	0.00392227	0.000275975	0.0703611	14.2124
Copiparvovirus	8.46228e-06	0	0	-
Dependoparvovirus	4.23114e-06	0	0	-
Circovirus	4.23114e-06	0	0	-
Gemycircularvirus	2.9618e-05	0	0	-
Betanudivirus	4.23114e-06	0	0	-
Cucumovirus	8.03916e-05	0	0	-
Closterovirus	0	0.00154025	-	0
Tobamovirus	0.056253	0.961451	17.0916	0.0585084
Potexvirus	3.38491e-05	0	0	-
Carlavirus	2.11557e-05	0	0	-
Pestivirus	1.26934e-05	0	0	-
Gammacarmovirus	4.23114e-06	0	0	-
Mitovirus	8.46228e-06	0	0	-
Norovirus	0.0271935	0.000242668	0.00892373	112.061
Sapovirus	0.000380802	0	0	-
Enterovirus	0.0355077	0	0	-
Parechovirus	0.700448	0	0	-
Sobemovirus	2.11557e-05	0	0	-
Mamastrovirus	0.0132012	0	0	-
Alpharetrovirus	1.26934e-05	0	0	-
Epsilonretrovirus	1.69246e-05	0	0	-
Gammaretrovirus	0.0051493	0	0	-
Pandoravirus	2.11557e-05	0	0	-
Chlorovirus	0.00110856	2.01523e-05	0.0181789	55.0089
Coccolithovirus	8.46228e-06	0	0	-
Phaeovirus	4.23114e-06	0	0	-
Prasinovirus	0.000562741	0.00138127	2.45455	0.407407
Raphidovirus	2.53868e-05	0	0	-
Cafeteriavirus	8.46228e-06	0	0	-
Mimivirus	0.000757374	1.8473e-05	0.0243908	40.999
Catovirus	2.53868e-05	0	0	-
Klosneuvirus	0.000765836	0	0	-
Lymphocystivirus	0.00270793	0	0	-
Marseillevirus	0.000270793	0	0	-
Parapoxvirus	3.80802e-05	0	0	-
Alphaentomopoxvirus	8.46228e-05	0.000505208	5.97012	0.167501
Betaentomopoxvirus	8.46228e-06	0	0	-
Mastadenovirus	0	0.000249105	-	0
