# Supplementary material for: Comparison of Gut Viral Communities in Atopic Dermatitis and Healthy Children
Source: PubMed Central journal article supplement (PMC8899399; doi:10.3389/fmed.2022.835467), 2022-02-21
Supplement: Table_1.pdf [file Table_1.pdf]

| Variables         | Control (n=12) | AD (n=21) | <i>P</i> value |
|-------------------|----------------|-----------|----------------|
| Sex (Male/Female) | 7/5            | 15/6      | 0.471          |
| Age (years)       |                |           |                |
| Total             | 10.0±1.3       | 10.5±1.2  | 0.297          |
| Male              | 10.6±0.9       | 11.0±1.0  | 0.477          |
| Female            | 9.1±1.2        | 9.3±0.6   | 0.811          |
